# Supplementary material for: Molecular Dynamics Simulation Study of the Interaction between Human Angiotensin Converting Enzyme 2 and Spike Protein Receptor Binding Domain of the SARS-CoV-2 B.1.617 Variant
Source: MDPI journal article supplement (doi:10.3390/biom11081244), 2021-08-20
Supplement: s1 [file s1]

**Molecular dynamics simulation study of the interaction between  
human angiotensin converting enzyme 2 and spike protein receptor  
binding domain of the SARS-CoV-2 B.1.617 variant**

Priya Antony<sup>1</sup> and Ranjit Vijayan<sup>1,\*</sup>

<sup>1</sup> Department of Biology, College of Science, United Arab Emirates University, PO Box 15551, Al Ain,  
United Arab Emirates

\* Correspondence: [ranjit.v@uaeu.ac.ae](mailto:ranjit.v@uaeu.ac.ae)

**SUPPLEMENTARY MATERIALS**

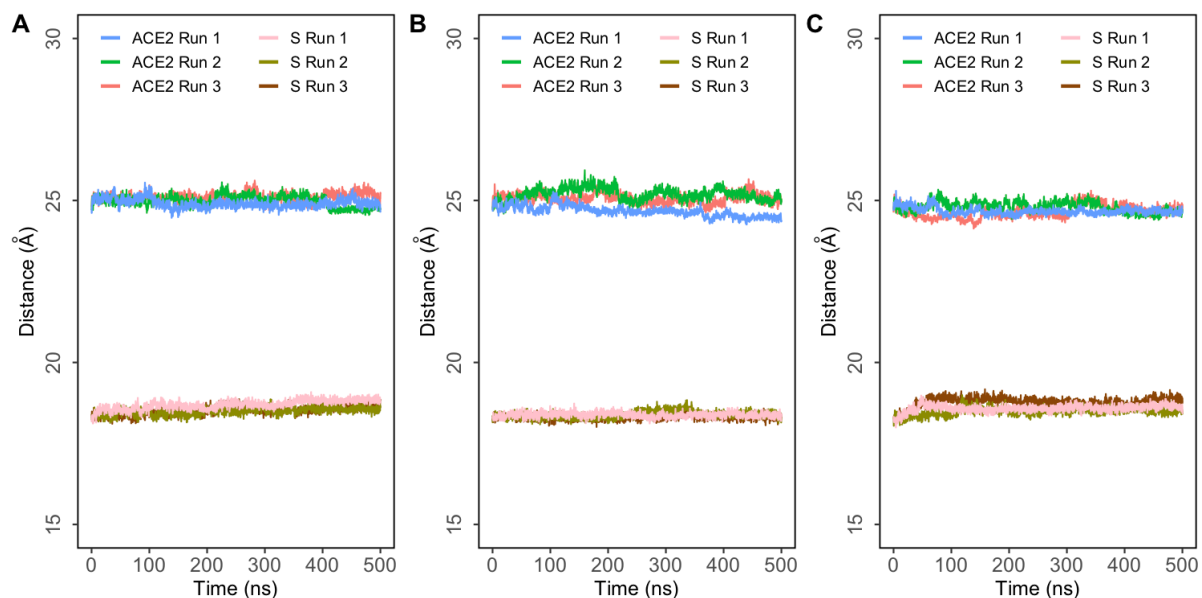

**Figure S1.** Radius of gyration (Rg) of human ACE2 (hACE2) and spike (S) protein of SARS-CoV-2 receptor-binding domain (RBD) from three 500 ns simulations of (A) E484Q+L452R; (B) E484Q; (C) L452R.

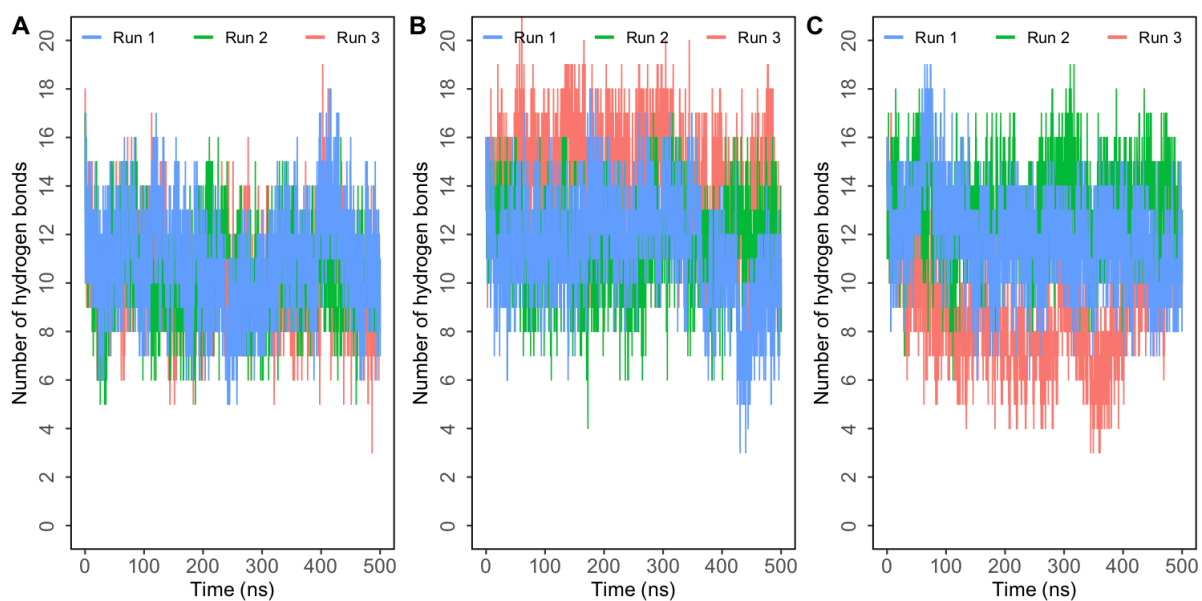

**Figure S2.** Hydrogen bonds between of human ACE2 (hACE2) and spike (S) protein of SARS-CoV-2 receptor-binding domain (RBD) from three 500 ns simulations of (A) E484Q+L452R; (B) E484Q; (C) L452R.
